# Supplementary material
Source: publisher figshare collection journal article supplement (https://sage.figshare.com/ndownloader/files/20502660)
Supplement: Supplementary file 1 [file 20502660]

# **The Wolves in Sheep's Clothing: How Russia's Internet Research Agency Tweets Appeared in U.S. News as Vox Populi**

## **Appendix A: Selection of top 100 IRA Accounts**

We collected from the 1% Twitter archive all tweets from 2015-2017 that either originated from the 2,752 IRA Twitter handles or contained their handles in the tweet text. This gives us 460,143 tweets, the majority (351,501) of which are “retweets” starting with RT or RT@ and only a few (108,642) are non-retweets. Based on the retweet relationship, 239,616 unique edges were created (e.g., if @A retweets @B, then A -- B) containing 168,649 unique nodes/handles. We then sorted the handles by in degree (the times being retweeted by any handle) and selected the top 100 handles. These handles were best-connected in the sense that they received the most retweeting and had their messages spread presumably most far and wide in the Twitter sphere.

Table 1 below displays the 30 handles with the highest in-degree (the times being retweeted by any handle), along with other degree information such as out-degree and total-degree (calculated the same way). For a full list of 100 accounts, please visit this link:

[https://osf.io/vrbep/?view\\_only=a5a7b1541f364c23ba56b258bf5ccd84](https://osf.io/vrbep/?view_only=a5a7b1541f364c23ba56b258bf5ccd84)

| handle          | total_degree | in_degree | out_degree |
|-----------------|--------------|-----------|------------|
| ten_gop         | 59816        | 59806     | 10         |
| crystaljohnson  | 35909        | 35905     | 4          |
| pamela_moore13  | 22533        | 22531     | 2          |
| coldwar20_ru    | 21801        | 21605     | 196        |
| lavrovmuesli    | 19137        | 18991     | 146        |
| comradzampolit  | 12516        | 12395     | 121        |
| kadirovruussia  | 11897        | 11892     | 5          |
| margosavazh     | 8486         | 8455      | 31         |
| gloed_up        | 8552         | 8313      | 239        |
| riafanru        | 7665         | 7665      | 0          |
| novostidamask   | 6673         | 6673      | 0          |
| jenn_abrams     | 6379         | 6371      | 8          |
| zubovnik        | 5949         | 5912      | 37         |
| trayneshacole   | 5954         | 5863      | 91         |
| southlonestar   | 5622         | 5621      | 1          |
| blacktolive     | 4689         | 4676      | 13         |
| blacknewsoutlet | 4643         | 4643      | 0          |
| thefoundingson  | 4571         | 4557      | 14         |
| maxdementiev    | 4571         | 4529      | 42         |
| bydrbre         | 4487         | 4485      | 2          |
| russianallies   | 2940         | 2938      | 2          |
| bleepthepolice  | 2927         | 2827      | 100        |

|                |      |      |   |
|----------------|------|------|---|
| usa_gunslinger | 2661 | 2657 | 4 |
| todayinsyria   | 1587 | 1587 | 0 |
| tpartynews     | 1422 | 1419 | 3 |
| pamelakealer13 | 1219 | 1219 | 0 |
| jeblary2016    | 1171 | 1171 | 0 |
| 10_gop         | 1088 | 1088 | 0 |
| nevnov_ru      | 1085 | 1085 | 0 |
| warfareww      | 1036 | 1036 | 0 |
| boeing_is_back | 932  | 932  | 0 |
| bydrbre_       | 928  | 928  | 0 |
| pigeontoday    | 820  | 820  | 0 |

### Appendix B: Number of Articles with IRA Tweets, by Outlet

|    | Outlet                 | Media         | # of articles |                    | Outlet                   | Media         | # of articles |
|----|------------------------|---------------|---------------|--------------------|--------------------------|---------------|---------------|
| 1  | The Inquisitr News     | Digital First | 29            | 40                 | Quartz                   | Digital First | 2             |
| 2  | The Daily Caller       | Digital First | 20            | 41                 | Refinery29               | Digital First | 2             |
| 3  | Breitbart              | Digital First | 13            | 42                 | al.com                   | Digital First | 1             |
| 4  | Right Scoop            | Digital First | 13            | 43                 | Boston Herald            | Print         | 1             |
| 5  | Daily Kos              | Digital First | 12            | 44                 | colorlines.com           | Digital First | 1             |
| 6  | The Blaze              | Digital First | 12            | 45                 | Daily Beast              | Digital First | 1             |
| 7  | IJR                    | Digital First | 10            | 46                 | Daily Telegraph          | Print         | 1             |
| 8  | The Washington Post    | Print         | 10            | 47                 | Detroit Free Press       | Digital First | 1             |
| 9  | Elite Daily            | Digital First | 9             | 48                 | DNA Info                 | Digital First | 1             |
| 10 | Yahoo News             | Digital First | 9             | 49                 | Forbes                   | Print         | 1             |
| 11 | Huffington Post        | Digital First | 8             | 50                 | Grist                    | Digital First | 1             |
| 12 | USA Today              | Print         | 8             | 51                 | Mic                      | Digital First | 1             |
| 13 | Fox News               | Broadcast     | 7             | 52                 | mintpressnews.com        | Digital First | 1             |
| 14 | mlive                  | Digital First | 7             | 53                 | Mother Jones             | Digital First | 1             |
| 15 | Russia Today           | Digital First | 7             | 54                 | New York Times           | Print         | 1             |
| 16 | The Epoch Times        | Digital First | 7             | 55                 | Newsone                  | Digital First | 1             |
| 17 | BuzzFeed               | Digital First | 6             | 56                 | Newsweek                 | Print         | 1             |
| 18 | Independent            | Digital First | 6             | 57                 | NPR                      | Radio         | 1             |
| 19 | Mashable               | Digital First | 6             | 58                 | NY Daily News            | Print         | 1             |
| 20 | NBC                    | Broadcast     | 6             | 59                 | NY Post                  | Print         | 1             |
| 21 | nj.com                 | Digital First | 6             | 60                 | PBS NewsHour             | Broadcast     | 1             |
| 22 | uproxx.com             | Digital First | 6             | 61                 | Slate                    | Digital First | 1             |
| 23 | IBTimes                | Digital First | 5             | 62                 | The Guardian             | Print         | 1             |
| 24 | The Hill               | Print         | 5             | 63                 | The Record (NJ)          | Print         | 1             |
| 25 | PJ Media               | Digital First | 4             | 64                 | The Verge                | Digital First | 1             |
| 26 | Raw Story              | Digital First | 4             | 65                 | Time                     | Print         | 1             |
| 27 | Salon                  | Digital First | 4             | 66                 | Upworthy                 | Digital First | 1             |
| 28 | SFGate                 | Digital First | 4             | 67                 | Vice                     | Digital First | 1             |
| 29 | US News & World Report | Print         | 4             | 68                 | Vox                      | Digital First | 1             |
| 30 | Business Insider       | Digital First | 3             | 69                 | Wall Street Journal      | Print         | 1             |
| 31 | CBS                    | Broadcast     | 3             | 70                 | Washington Examiner      | Print         | 1             |
| 32 | CNN                    | Broadcast     | 3             | 71                 | Washington Times         | Print         | 1             |
| 33 | Conservative Treehouse | Digital First | 3             | 72                 | Alternet                 | Digital First | 0             |
| 34 | Market Watch           | Digital First | 3             | 73                 | America's Journal Review | Digital First | 0             |
| 35 | ABC                    | Broadcast     | 2             | 74                 | American News            | Digital First | 0             |
| 36 | Daily Mail             | Print         | 2             | 75                 | bb4sp.com                | Digital First | 0             |
| 37 | Gothamist              | Digital First | 2             | 76                 | BBC                      | Digital First | 0             |
| 38 | LA Times               | Print         | 2             | 77                 | Clash Daily              | Digital First | 0             |
| 76 | BBC                    | Digital First | 0             | More on next page. |                          |               |               |

|     |                         |               |   |
|-----|-------------------------|---------------|---|
| 78  | common dreams           | Digital First | 0 |
| 79  | Conservative Daily Post | Digital First | 0 |
| 80  | Conservative Fighters   | Digital First | 0 |
| 81  | Daily Wire              | Digital First | 0 |
| 82  | DC Clothes Line         | Digital First | 0 |
| 83  | DC Whispers             | Digital First | 0 |
| 84  | Dead State              | Digital First | 0 |
| 85  | Free Beacon             | Digital First | 0 |
| 86  | Gateway Pundit          | Digital First | 0 |
| 87  | HeatStreet              | Digital First | 0 |
| 88  | Hot Air                 | Digital First | 0 |
| 89  | Information Liberation  | Digital First | 0 |
| 90  | InfoWars                | Digital First | 0 |
| 91  | joeforamerica.com       | Digital First | 0 |
| 92  | mediaite.com            | Digital First | 0 |
| 93  | Nation of Change        | Digital First | 0 |
| 94  | National Review         | Digital First | 0 |
| 95  | newsbreakshere.com      | Digital First | 0 |
| 96  | newsfrompolitics.com    | Digital First | 0 |
| 97  | People                  | Print         | 0 |
| 98  | Politico                | Digital First | 0 |
| 99  | Prison Planet           | Digital First | 0 |
| 100 | Real Clear Politics     | Digital First | 0 |
| 101 | Red State               | Digital First | 0 |
| 102 | Reverb Press            | Digital First | 0 |
| 103 | rinf.com                | Digital First | 0 |
| 104 | Rolling Stone           | Print         | 0 |
| 105 | Talking Points Memo     | Digital First | 0 |
| 106 | The Political Insider   | Digital First | 0 |
| 107 | Think Progress          | Digital First | 0 |
| 108 | townhall.com            | Digital First | 0 |
| 109 | truthfeed.com           | Digital First | 0 |
| 110 | twitchy                 | Digital First | 0 |
| 111 | US Defense Watch        | Digital First | 0 |
| 112 | US Herald               | Digital First | 0 |
| 113 | Viral Patriot           | Digital First | 0 |
| 114 | Web Daily               | Digital First | 0 |
| 115 | worldnetdaily           | Digital First | 0 |
| 116 | worldpoliticus.com      | Digital First | 0 |
| 117 | Zero Hedge              | Digital First | 0 |

## Appendix C: Codebook

### Basic Information

|     |                                                                                                                                                                                                                                                                                                                                                                                                                                         |                                           |                                                                      |
|-----|-----------------------------------------------------------------------------------------------------------------------------------------------------------------------------------------------------------------------------------------------------------------------------------------------------------------------------------------------------------------------------------------------------------------------------------------|-------------------------------------------|----------------------------------------------------------------------|
| (A) | <p>Is the article about sockpuppets? [RELEVANT, FK: 0.83]</p> <p>(A) <b><i>Cases should be excluded</i></b> when the search term picks up an irrelevant story (not related to the handle), or when the handle is discussed as “being discovered.”</p> <p>(B) Cases which include Facebook pages/groups with the same name as the handle should be kept, but <b><i>notated</i></b> (you may not be able to answer all the questions)</p> | <p>1 = Relevant;<br/>0 = Not Relevant</p> | <p><b><i>If it is not relevant, please stop coding here.</i></b></p> |
|-----|-----------------------------------------------------------------------------------------------------------------------------------------------------------------------------------------------------------------------------------------------------------------------------------------------------------------------------------------------------------------------------------------------------------------------------------------|-------------------------------------------|----------------------------------------------------------------------|

### Content of Article

|    | <b>I. Topic of the News Story</b>                                                                                                                                                                                                                                                                                                                                                                                                                                                                                            |                                                               |                                                             |
|----|------------------------------------------------------------------------------------------------------------------------------------------------------------------------------------------------------------------------------------------------------------------------------------------------------------------------------------------------------------------------------------------------------------------------------------------------------------------------------------------------------------------------------|---------------------------------------------------------------|-------------------------------------------------------------|
| 1  | Is the story about the election? [T_elect, FK: 0.88]                                                                                                                                                                                                                                                                                                                                                                                                                                                                         | 1 = Yes;<br>0 = No                                            | e.g., polls, campaign stops, etc.                           |
| 2  | Is the article talking about a specific candidate? [T_can, FK: 0.82]                                                                                                                                                                                                                                                                                                                                                                                                                                                         | 1= Trump<br>2 = Clinton;<br>3 = Other candidates;<br>99 = N/A |                                                             |
| 3  | Is the story talking about a political issue? (includes int'l and domestic issues) [T_issue, FK: 0.71]                                                                                                                                                                                                                                                                                                                                                                                                                       | 1 = Yes;<br>0 = No                                            | e.g., LGBTQ issues, taxes, guns, police brutality, election |
| 3a | <p>If the story is talking about a political issue, is the story about “policy” or “issues” political issues? [T_issue_type, FK: 0.88]</p> <p>(1) If the article references campaign events, a politician, party, government agency, or specific policy, code as “policy”</p> <p>(2) If the article is about a protest, a hashtag-call-to-action boycott, racial injustice (none of which relate to a policy) code as “issues”</p> <p>(3) Remarks about politicians in non-government settings should be coded as “soft”</p> | <p>1 = policy<br/>0 = issues<br/>99 = not political</p>       |                                                             |

|                                     |                                                                                                                                                                                                                                                                                                                                                                                                                  |                                                                   |                                                                                                                                    |
|-------------------------------------|------------------------------------------------------------------------------------------------------------------------------------------------------------------------------------------------------------------------------------------------------------------------------------------------------------------------------------------------------------------------------------------------------------------|-------------------------------------------------------------------|------------------------------------------------------------------------------------------------------------------------------------|
| 4                                   | In three words, what political issue is discussed?<br>[T_issue2]                                                                                                                                                                                                                                                                                                                                                 | (words)                                                           |                                                                                                                                    |
| 5                                   | Is the story about a Twitter topic? [T_trend, FK: 0.87]<br>(A) If people are discussing a topic on Twitter, this constitutes a Twitter topic.<br>(B) If the topic is a news story (e.g., shooting at concert), and there happens to be Twitter responses, the story is not about a Twitter topic                                                                                                                 | 1 = Yes;<br>0 = No                                                | e.g., the article describes a “discussion” or “debate” on Twitter (includes stories that happened offline, that Twitter responded) |
| 6                                   | Does the story use string-of-tweets reporting?<br>[T_motw; FK: 0.82]<br>(A) If a story is a list of tweets (e.g. “these 12 tweets will...”), code as “yes” (often identifiable in headline)<br>(B) If a story has more than 3 tweets in a row, code “yes”<br>(C) Hypothetically, if you remove the tweets, how much information is left? If there is not enough information to understand the story, code as “0” | 1 = Yes;<br>0 = No                                                | There should be no journalistic content between the “string of tweets”                                                             |
| 7                                   | If not a political topic, please describe the topic of the article in one or two words [T_misc]                                                                                                                                                                                                                                                                                                                  | (words)                                                           |                                                                                                                                    |
| 8                                   | Does the article show disagreement (i.e., competing perspectives on an issue/topic)? [T_sides, FK: 0.72]<br>(A) Differing perspectives are not limited to tweets<br>(B) Code 1 (yes) even if only one paragraph or tweet shows a different viewpoint                                                                                                                                                             | 1 = Yes;<br>0 = No                                                |                                                                                                                                    |
| 9                                   | Do all the tweets in this article have congruent political ideology? [T_congruent, FK: 0.75]<br>(A) Make inferences based on the content of the tweet, it is okay to check externally (but avoid this if possible)                                                                                                                                                                                               | 1 = all lib<br>2 = all con<br>0 = mixed tweets<br>99 = apolitical | e.g., “The hashtag also prompted a vigorous backlash, with people critical of the refugee ban co-opting the hashtag...”            |
| <b>II. Tweet Use</b>                |                                                                                                                                                                                                                                                                                                                                                                                                                  |                                                                   |                                                                                                                                    |
| 10                                  | How many tweets are in the article? [TW_n, FK: 0.92]                                                                                                                                                                                                                                                                                                                                                             | (number)                                                          |                                                                                                                                    |
| 11                                  | Are other people ( <b>not tweets</b> ) interviewed, quoted, paraphrased, or sourced in the news story? [TW_other, FK: 1.0]                                                                                                                                                                                                                                                                                       | 1 = Yes<br>0 = No                                                 |                                                                                                                                    |
| <b>III. Post-Hoc Sockpuppet Use</b> |                                                                                                                                                                                                                                                                                                                                                                                                                  |                                                                   |                                                                                                                                    |

|    |                                                                                                                                                               |                   |  |
|----|---------------------------------------------------------------------------------------------------------------------------------------------------------------|-------------------|--|
| 12 | Does the article include a post-hoc correction about the sockpuppet? [Disclosure, FK: 0.83]                                                                   | 1 = Yes<br>0 = No |  |
| 13 | Has the sockpuppet been removed from the story?<br>[Removal, FK: 0.90]<br>(A) If you had to use the wayback machine to find the article, code this as 1 (yes) | 1 = Yes<br>0 = No |  |

### Article's Use of Specific Tweet

|    |                                                                                                                                                                                                                                |                                            |                                                                                                                                           |
|----|--------------------------------------------------------------------------------------------------------------------------------------------------------------------------------------------------------------------------------|--------------------------------------------|-------------------------------------------------------------------------------------------------------------------------------------------|
| 14 | What number tweet is it in the story? [ATW_n, FK: 1.0]                                                                                                                                                                         | (number)                                   | Note if the sockpuppet is listed as the "first" of a set of opinions.                                                                     |
|    | <b>I. How Is the Tweet Being Described?</b>                                                                                                                                                                                    |                                            |                                                                                                                                           |
| 15 | Is the tweet handle mentioned aside from the use of the tweet? [ATW_handle, FK: 0.71]<br>(A) If a tweet is "dropped" into a news article without mention of it before or after, code this as a 0 (No)                          | 1 = yes;<br>0 = no                         | <i>If a tweet is dropped in, 17, 18, and 19 should be "0"</i>                                                                             |
| 16 | Is the tweet being described as originating from authoritative source? [ATW_aut, FK: 0.75]<br>(A) An authoritative source is popular or representative of some group (e.g., a "prominent" handle)                              | 1 = yes<br>0 = no                          |                                                                                                                                           |
| 17 | Is the tweet being described as a "man on the street"? [ATW_reg, FK: 0.71]                                                                                                                                                     | 1 = yes<br>0 = no                          | If the article broadly describes a group of tweets as "coming from the people" without specific mention of the handle still code as "yes" |
|    | <b>II. What Use Is the Outlet Making of the Tweet</b>                                                                                                                                                                          |                                            |                                                                                                                                           |
| 18 | Is the sockpuppet tweet a source of information? [ATW_info, FK: 0.71]                                                                                                                                                          | 1 = yes<br>0 = no                          |                                                                                                                                           |
| 19 | Is the sockpuppet tweet the primary or sole information of a claim? [ATW_info_prim, FK: 0.74]                                                                                                                                  | 1 = yes<br>0 = no                          |                                                                                                                                           |
| 20 | Is the sockpuppet tweet a source of opinion (not providing information, but providing commentary?) [ATW_op, FK: 0.73]                                                                                                          | 1 = yes<br>0 = no                          |                                                                                                                                           |
| 21 | Is the journalist describing the sockpuppet positively or negatively? [ATW_tone, FK: 0.80]<br>(1) If the article broadly describes "comments from Twitter," with a positive/negative tone (example: "Here are some of the best | 1 = positive<br>0 = nothing<br>-1 negative | Reputable sources are likely to be "neutral"                                                                                              |

|  |                                                           |  |  |
|--|-----------------------------------------------------------|--|--|
|  | questions/comments we received from<br>Breitbart reader”) |  |  |
|--|-----------------------------------------------------------|--|--|

### Content of Embedded Sockpuppet Tweet

|     |                                                                                                                                                                                                                                                                      |                                              |                                                                      |
|-----|----------------------------------------------------------------------------------------------------------------------------------------------------------------------------------------------------------------------------------------------------------------------|----------------------------------------------|----------------------------------------------------------------------|
| 22  | Is the tweet in support of a liberal, or conservative ideology, or is it mixed? [STW_pol, FK: 0.78]                                                                                                                                                                  | 1 = liberal<br>2 = conservative<br>0 = mixed |                                                                      |
| 23  | Does the tweet include deceptive (incorrect) information? [STW_false, FK: 0.89]<br>(A) This will require you to look elsewhere (outside of the article); do not spend significant time if unverifiable<br>(B) This specifically refers to <b>factual</b> information | 1 = yes<br>0 = no or unknown                 | <i><b>If unable to verify, write “N/A” and include a note</b></i>    |
| 24  | Does the tweet try to “troll” people? [STW_troll, FK: 0.86]<br>(A) To troll is to intentionally antagonize someone online                                                                                                                                            | 1 = yes<br>0 = no                            |                                                                      |
| 25  | Does this tweet have a call to action? [STW_action, FK: 0.85]                                                                                                                                                                                                        | 1 = yes<br>0 = no                            | e.g., “The hashtag #BoycottStarbucks was trending Monday on Twitter” |
| 26  | Does this tweet use a hashtag? [STW_#]                                                                                                                                                                                                                               | 1 = yes<br>0 = no                            |                                                                      |
| 27  | If so, what is the hashtag? [STW_#2]                                                                                                                                                                                                                                 | (hashtags)                                   |                                                                      |
| 28  | Is the tweet sarcastic? [STW_sarc, FK: 0.82]                                                                                                                                                                                                                         | 1 = yes<br>0 = no                            |                                                                      |
| N/A | Are there any other notes you would like to include? [Notes]                                                                                                                                                                                                         |                                              |                                                                      |



### Appendix D: Stratified random sample tweets that were embedded in news stories

|    | IRA handle ( <i>Ideology</i> ) | Tweet                                                                                                                                         | Publication(s)                         |
|----|--------------------------------|-----------------------------------------------------------------------------------------------------------------------------------------------|----------------------------------------|
| 1  | @Crystal1Johnson (L)           | The Wade quadruplets, Nigel, Zach, Aaron and Nick, all 18, have all been accepted to both Harvard and Yale                                    | Elite Daily                            |
| 2  | @trayneshacole (L)             | African American Woman who took a oath to serve & protect   I support this movement #VeteransForKaepernick<br>pic.twitter.com/7SYSt1DXLn      | CBS                                    |
| 3  | @blacktolive (L)               | They didn't associate themselves with Black Lives Matter mvmnt. Haters are just trying to clutch at 'evil black people' straw#BLMKidnapping   | The Verge                              |
| 4  | @BlackNewsOutlet (L)           | Two students were attacked Saturday night at the USM vs. Rice University football game for refusing to stand for National Anthem              | Raw Story                              |
| 5  | @gloed_up (L)                  | #AllLivesDidntMatter when they didn't include the rest of American history in books to only teach us about white American contributions.      | Huffington Post                        |
| 6  | @TEN_GOP (C)                   | RT if you also think Lester Holt did a bad job moderating tonight! He didn't mention: her lies, Benghazi, Emails!<br>#debatenight #Debates    | Yahoo News                             |
| 7  | @pamela_moore13 (C)            | Hiring 10k refugees makes liberals feel warm BUT we have homeless vets that need those jobs.#BoycottStarbucks<br>#ReasonsToProtest #MuslimBan | Fox News                               |
| 8  | @southlonestar (C)             | Muslim woman pays no mind to the terror attack, casually walks by a dying man while checking phone#PrayForLondon #Westminster<br>#BanIslam    | Washington Post                        |
| 9  | @TEN_GOP (C)                   | Massive crowd waiting outside for the Trump rally in Phoenix!                                                                                 | Daily Beast; Inquisitr News; USA Today |
| 10 | @usa_gunslinger (C)            | Libs, do you find this picture offensive? #HeterosexualPrideDay                                                                               | The Guardian                           |

*Ideology*: L = Liberal, C = Conservative [Five Liberal tweets and five Conservative tweets were randomly sampled]
